# Supplementary material for: Wetter environment and increased grazing reduced the area burned in northern Eurasia: 2002–2016
Source: Copernicus journal article supplement (doi:10.5194/bg-2020-139), 2020-05-07
Supplement: Supplementary file 1 [file bg-2020-139-supplement.pdf]

1 **Wetter environment and increased grazing reduced the area burned in northern Eurasia: 2002 – 2016**

2 Wei Min Hao<sup>1</sup>, Matthew C. Reeves<sup>2</sup>, L. Scott Baggett<sup>3</sup>, Yves Balkanski<sup>4</sup>, Philippe Ciais<sup>4</sup>, Bryce L. Nordgren<sup>1</sup>, Alexander Petkov<sup>1</sup>,  
3 Rachel E. Corley<sup>1</sup>, Florent Mouillot<sup>5</sup>, Shawn P. Urbanski<sup>1</sup>, Chao Yue<sup>6</sup>

4  
5 <sup>1</sup>United States Forest Service, Rocky Mountain Research Station, Fire Sciences Laboratory, 5775 Highway 10 West, Missoula, MT  
6 59808 USA.

7 <sup>2</sup>United States Forest Service, Rocky Mountain Research Station, Forestry Sciences Laboratory, 800 E. Beckwith, Missoula, MT  
8 59801, USA.

9 <sup>3</sup>United States Forest Service, Rocky Mountain Research Station, 240 West Prospect, Fort Collins, CO 80526, USA.

10 <sup>4</sup>Laboratoire des Sciences du Climat et de l'Environnement, LSCE CEA CNRS UVSQ, 91191 Gif Sur Yvette, France.

11 <sup>5</sup>UMR CEFE 5175, Centre National de la Recherche Scientifique (CNRS), Université de Montpellier, Université Paul-Valéry  
12 Montpellier, Ecole Pratique des Hautes Etudes (EPHE), Institut de Recherche pour le Développement, 34293 Montpellier CEDEX 5,  
13 France.

14 <sup>6</sup>Institute of Soil and Water Conservation, Northwest A&F University, Yangling, Shaanxi 712100, P.R. China.

15

16 **Correspondence:** Wei Min Hao ([weimin.hao@usda.gov](mailto:weimin.hao@usda.gov))

17

18 **Supporting Information**

19

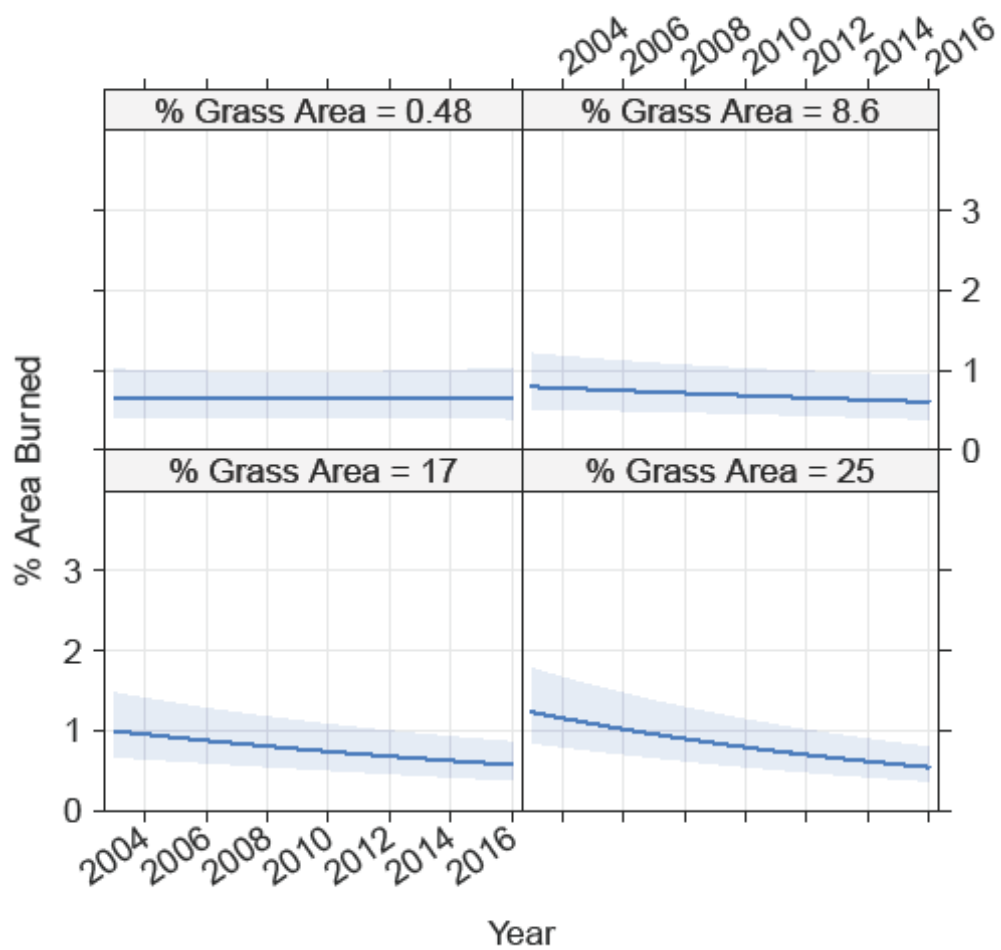

20  
21  
22

**Fig. S1.1.** Effects of year and percent of grass area on the area burned.

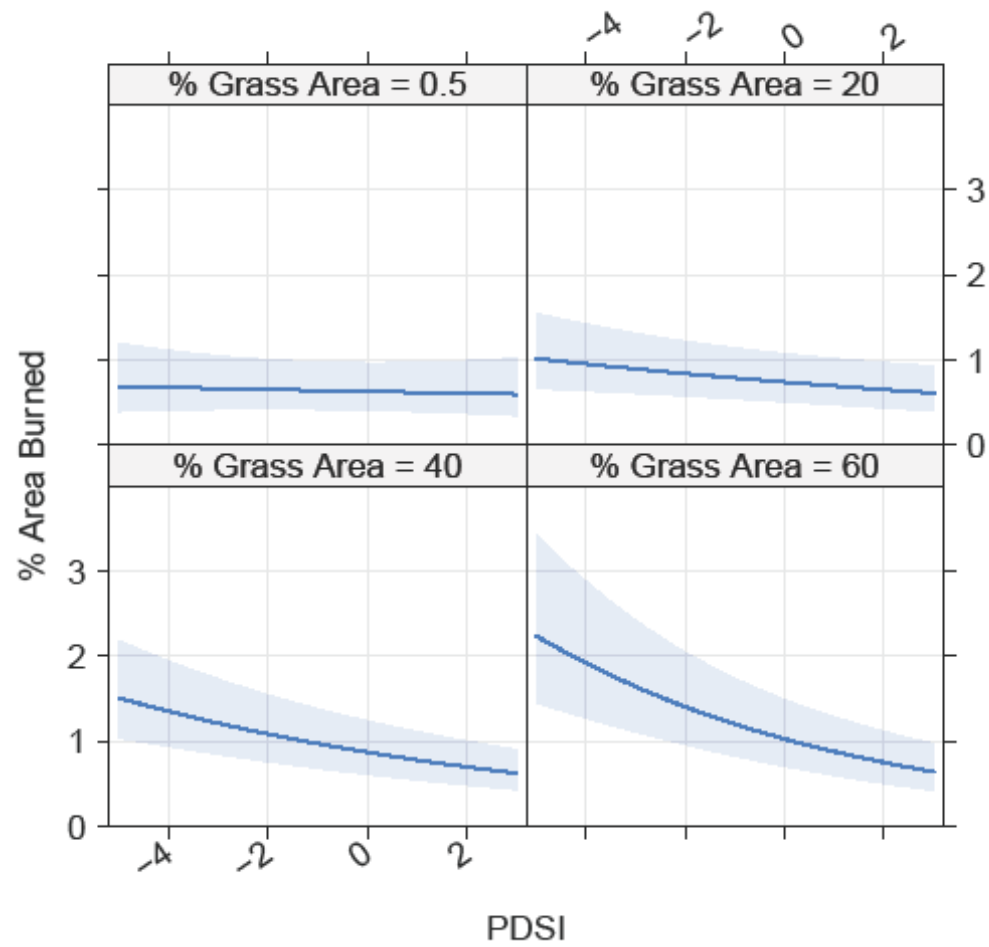

**Fig. S1.2.** Effects of PDSI and percent of grass area on the area burned.

23  
24  
25  
26  
27

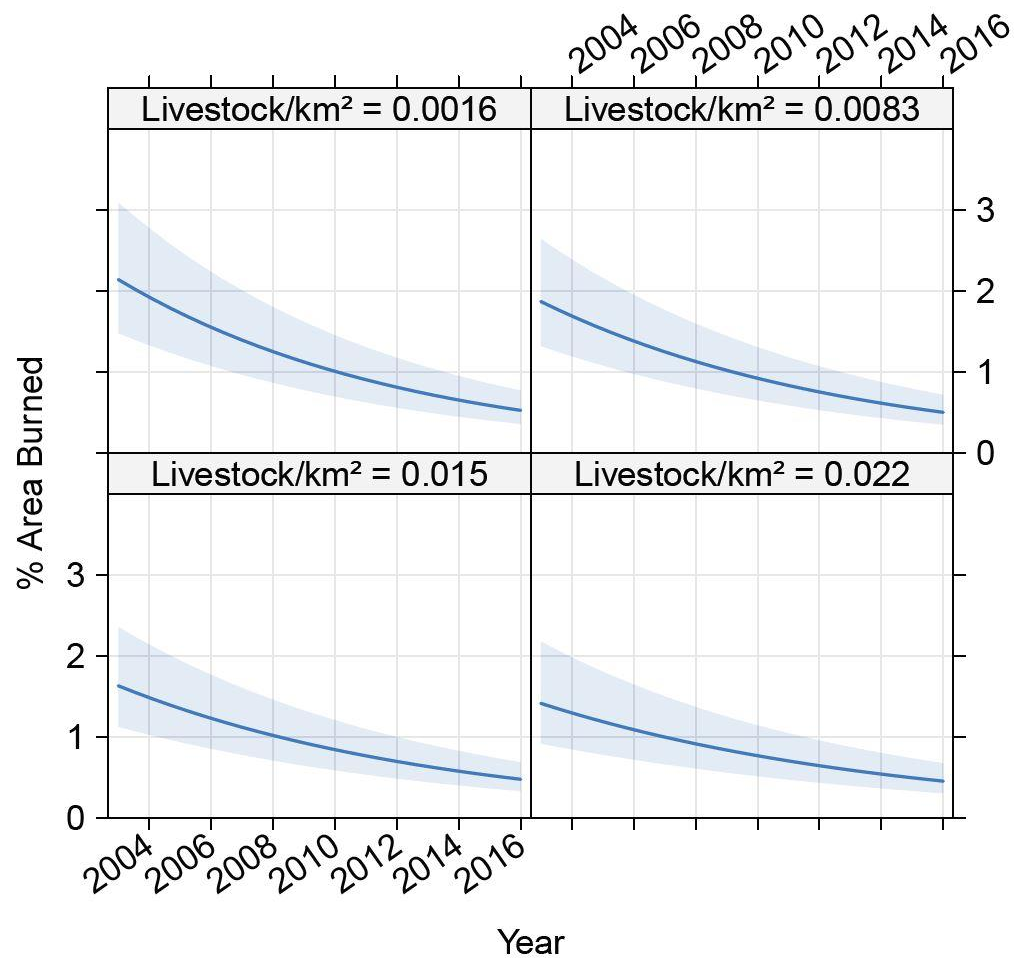

**Fig. S1.3.** Effects of livestock density and year on the area burned.

28  
29  
30  
31

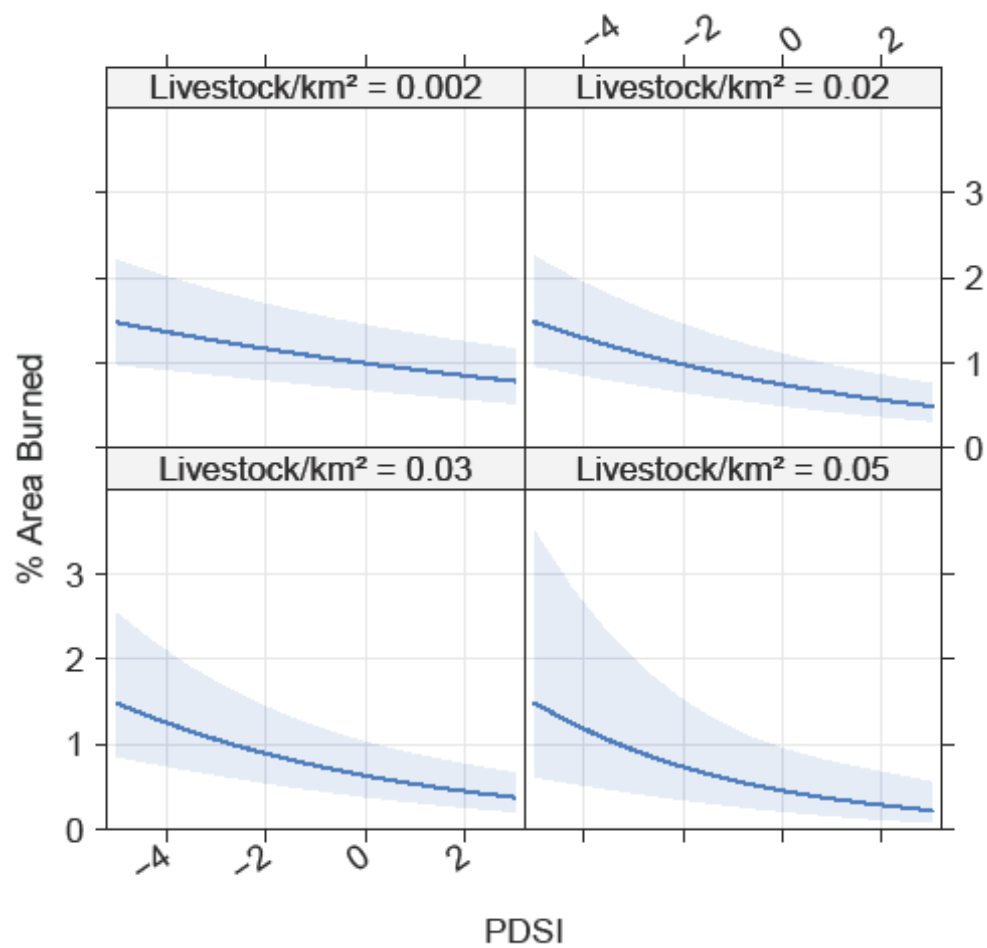

**Fig. S1.4.** Effects of PDSI and livestock density on the area burned.

32  
33  
34  
35  
36  
37

38  
39  
40  
41  
42  
43

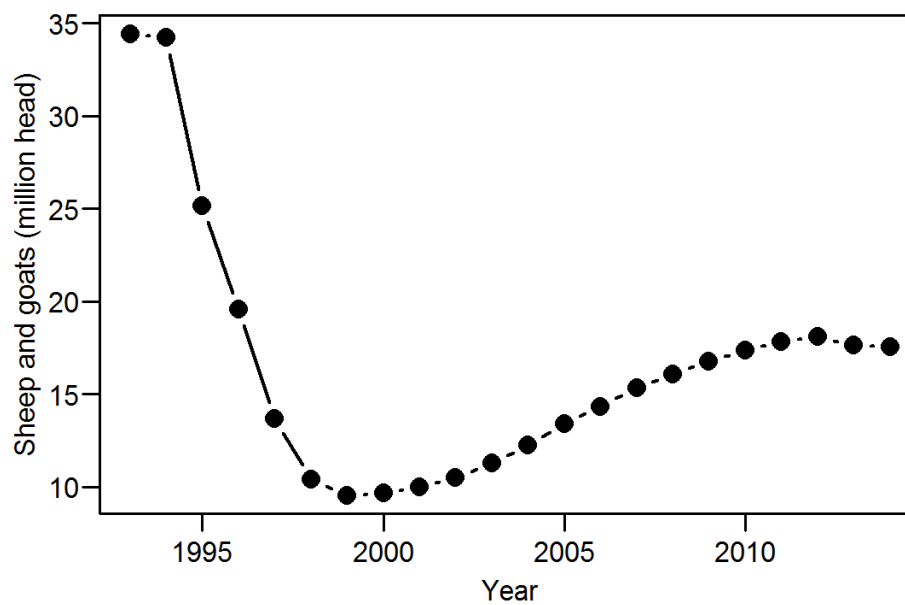

**Fig. S2:** Number of sheep and goats in Kazakhstan from 1993 to 2014 (Food and Agriculture Organization, 2016).

44  
45  
46  
47  
48

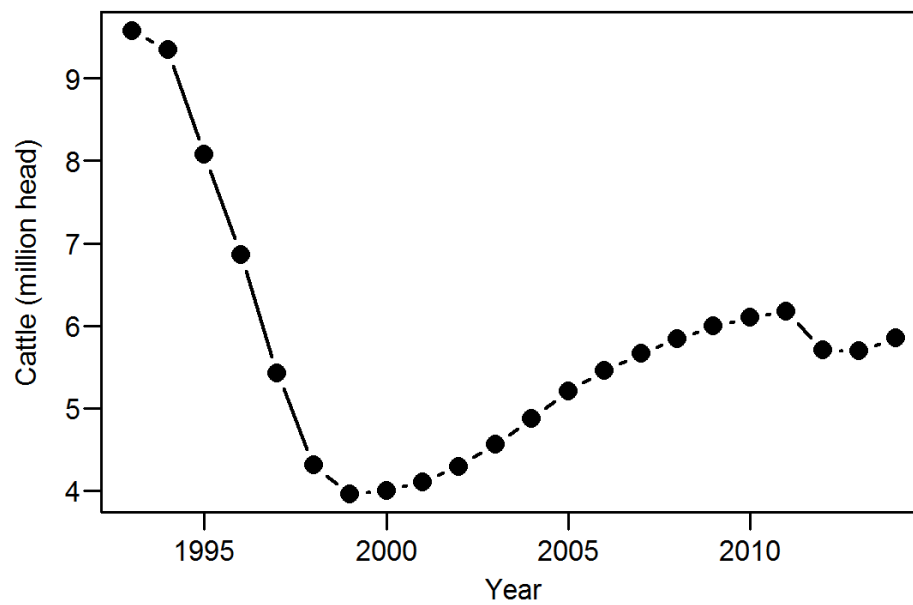

**Fig. S3.** Number of cattle in Kazakhstan from 1993 to 2014 (Food and Agriculture Organization, 2016).

49  
50  
51  
52  
53
